# Supplementary material
Source: MDPI journal article supplement (https://www.mdpi.com/2072-4292/16/10/1660)
Supplement: s1 [file s1]

## Supplementary Material

### Incoming Shortwave Radiation Results for Each Flight Day

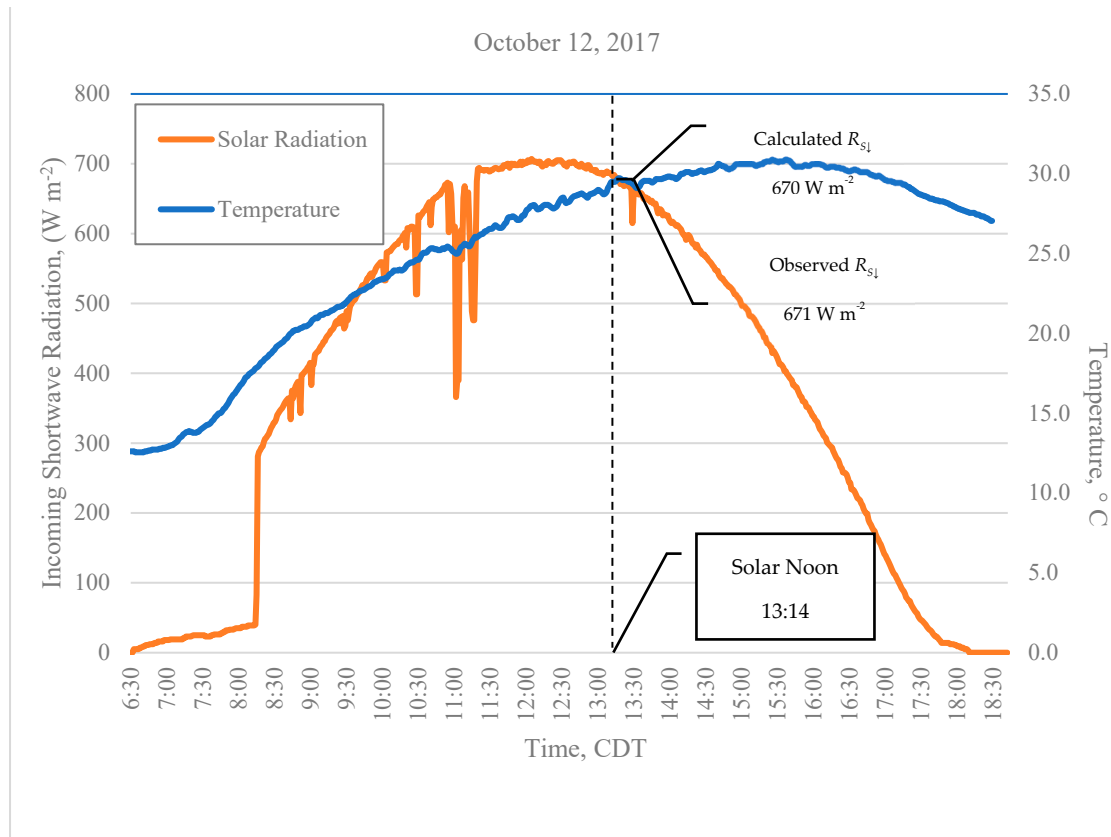

October 17, 2017

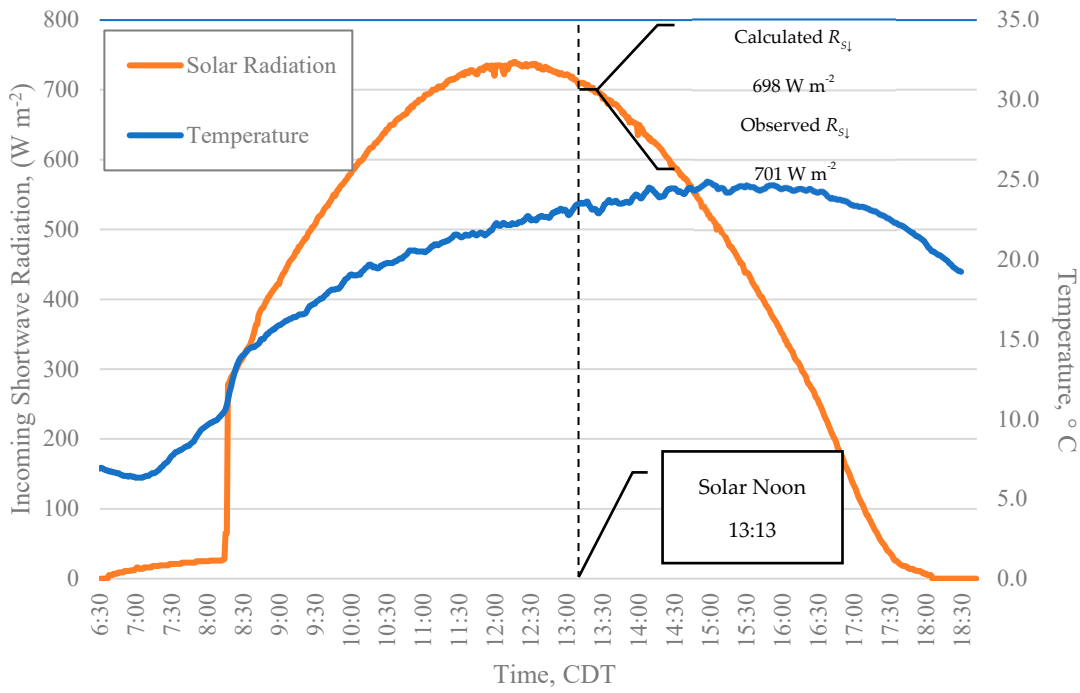

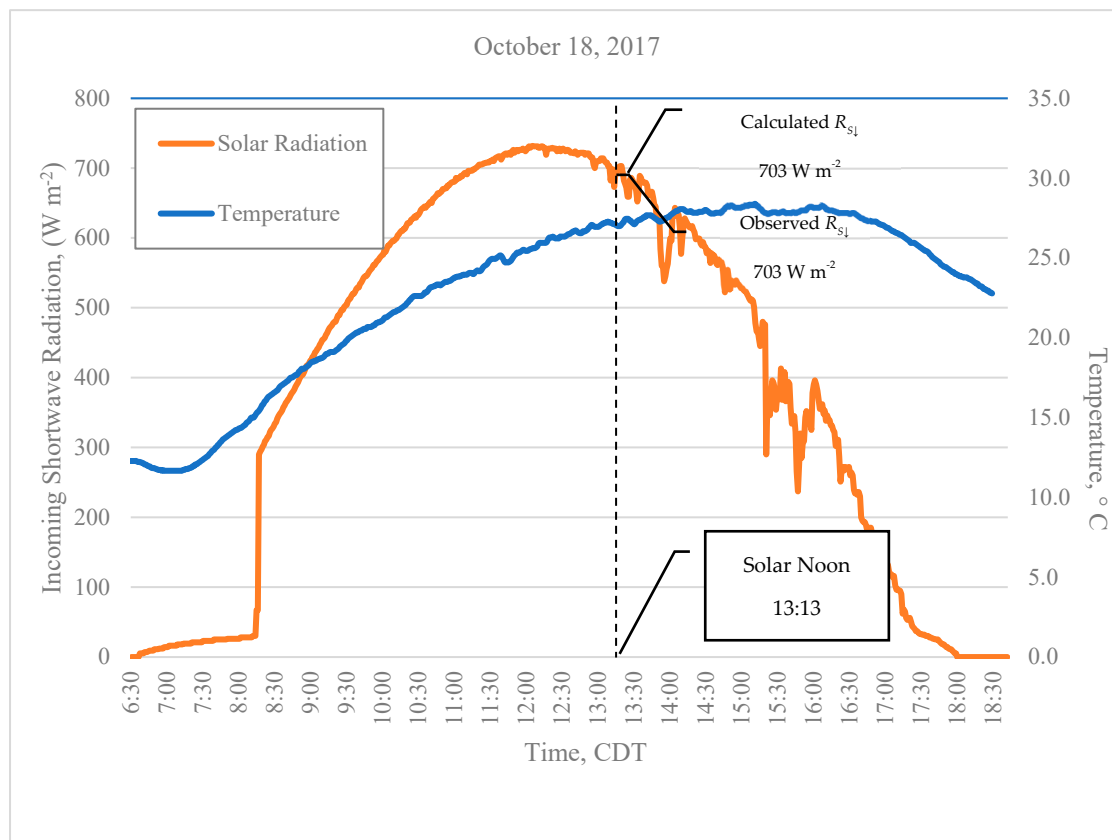

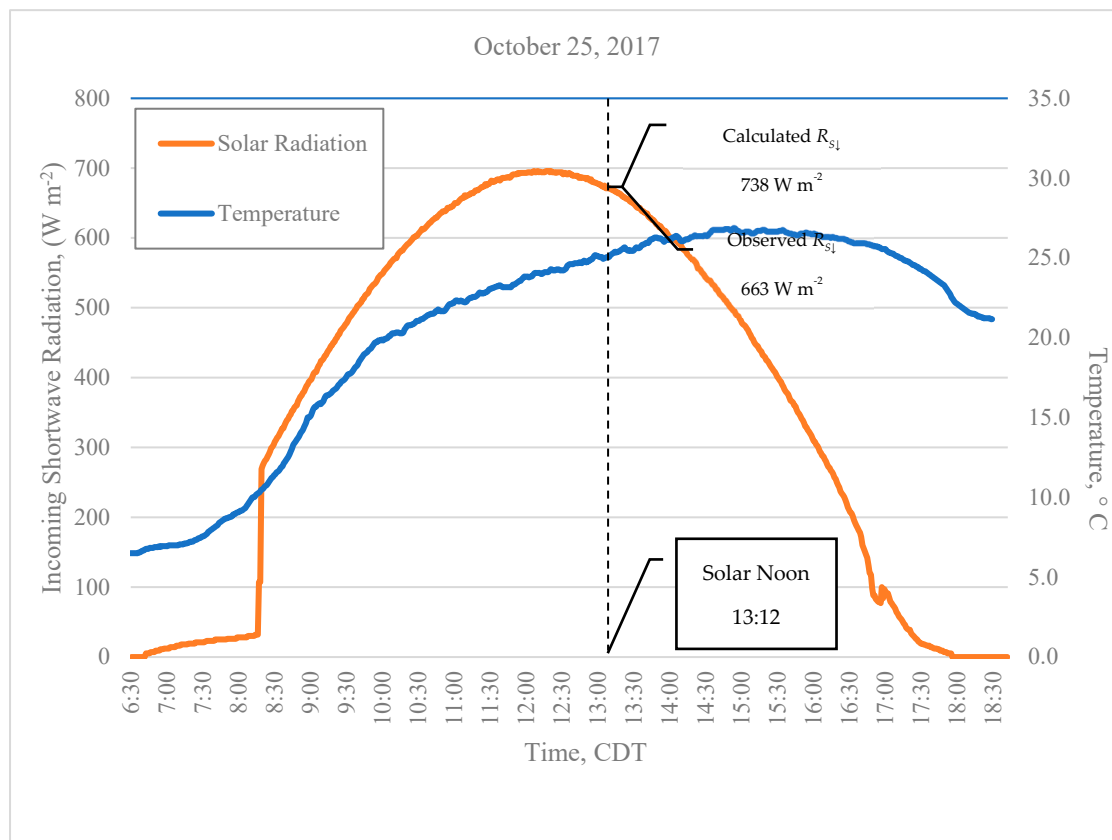

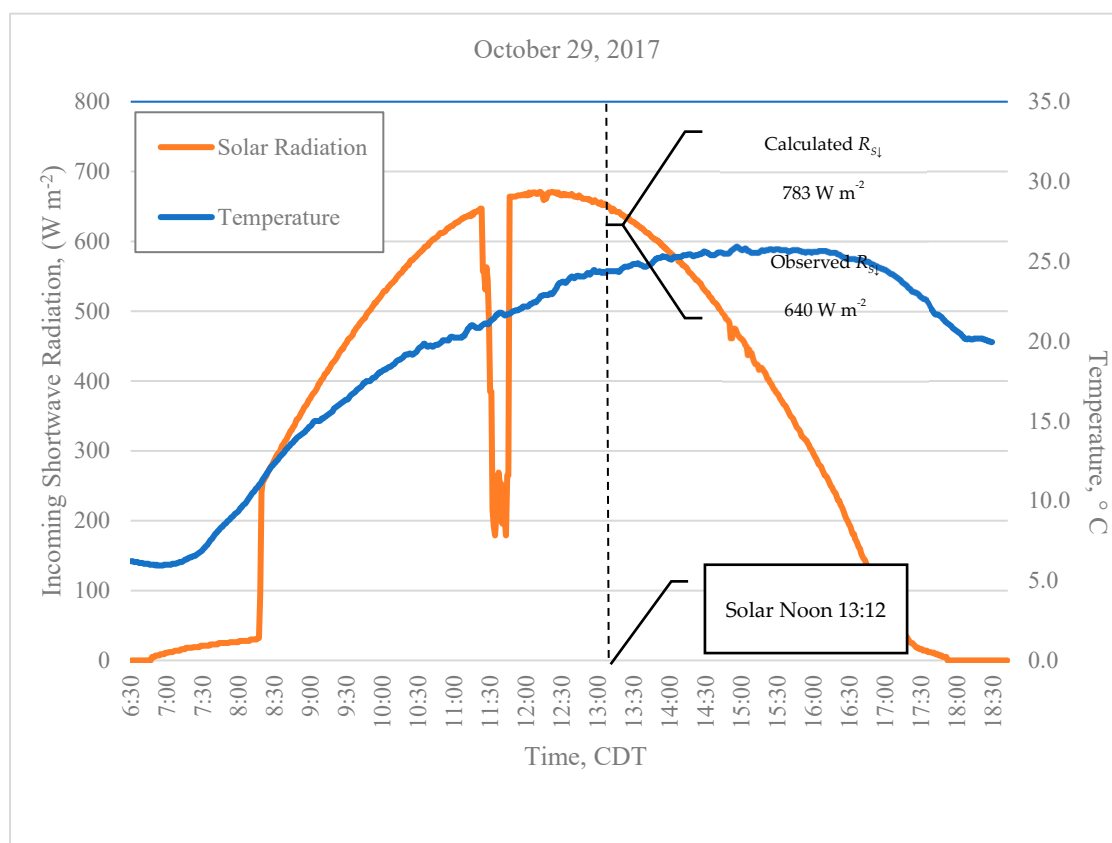

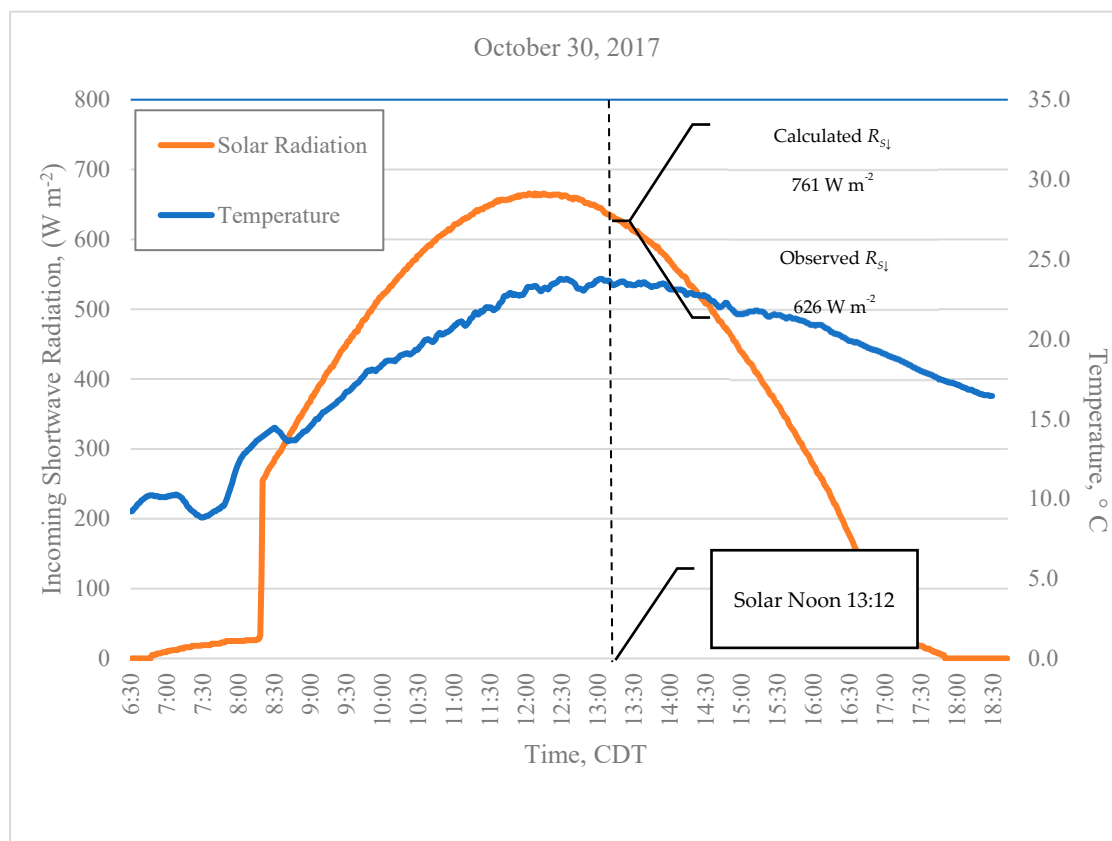

---

Histograms of the residual between observed and modeled Volumetric Water Content ( $\text{m}^3 \text{m}^{-3}$ ) for October 12 through October 30, 2017.

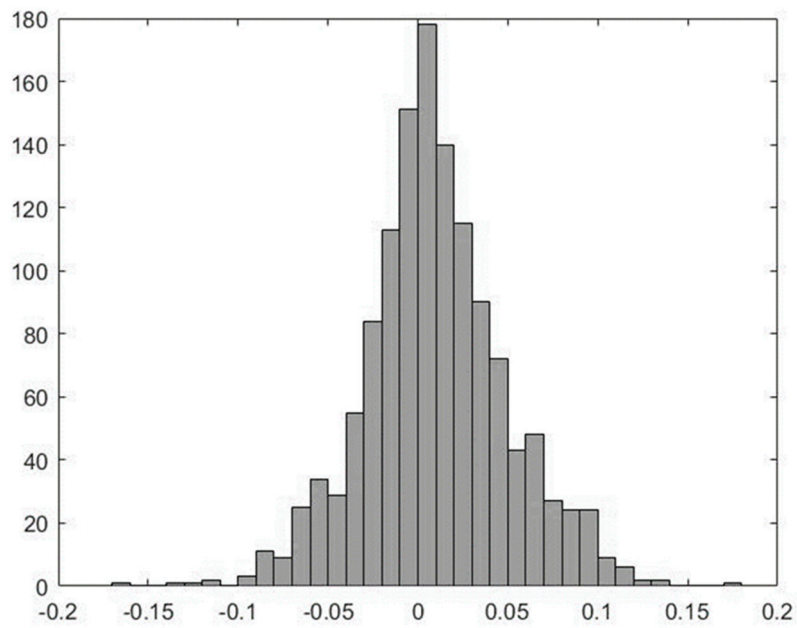

---

Histograms of the residual between observed and modeled Volumetric Water Content ( $\text{m}^3 \text{ m}^{-3}$ ): (a) October 12; (b) October 17; (c) October 18; (d) October 25; (e) October 29; (f) October 30, 2017.

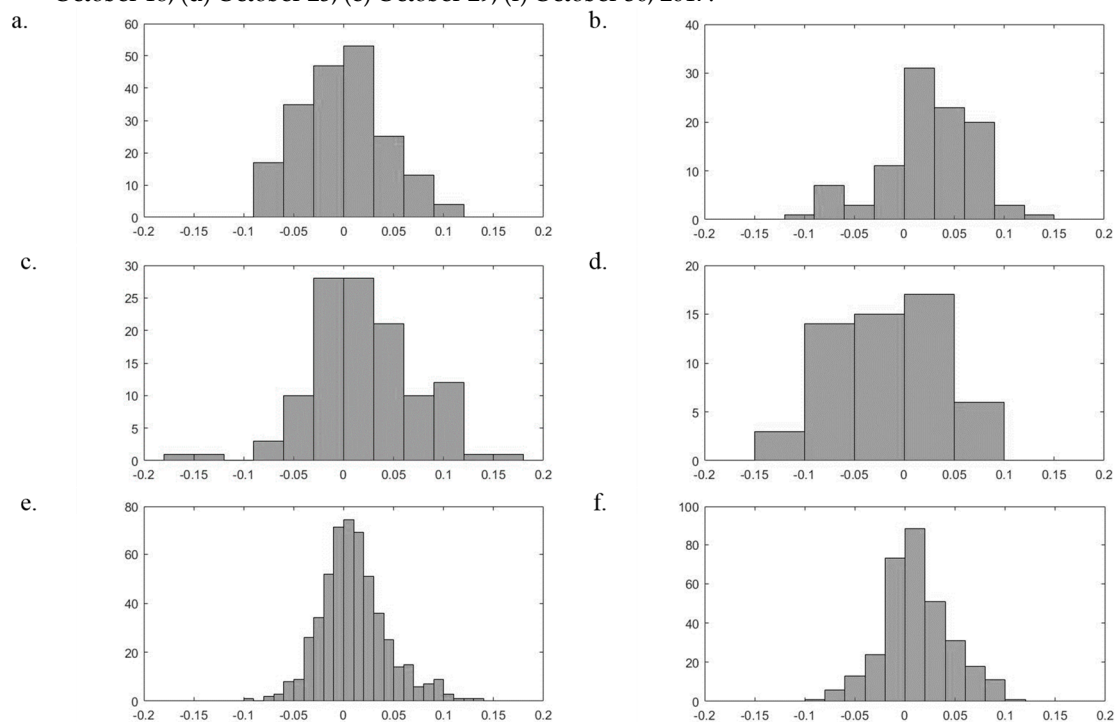



Lab analysis for soil samples

|                     | Specific Heat                                                 | Sand Fraction     | Thermal Conductivity                                                          |                                                                               | Volumetric Saturated SWC                          | Dry Bulk Density of Soil                          |
|---------------------|---------------------------------------------------------------|-------------------|-------------------------------------------------------------------------------|-------------------------------------------------------------------------------|---------------------------------------------------|---------------------------------------------------|
|                     | $C_s \text{ (J}\cdot\text{kg}^{-1}\cdot\text{K}^{-1}\text{)}$ | $f_s \text{ (-)}$ | $\lambda_{\text{dry}} \text{ (W}\cdot\text{m}^{-1}\cdot\text{K}^{-1}\text{)}$ | $\lambda_{\text{sat}} \text{ (W}\cdot\text{m}^{-1}\cdot\text{K}^{-1}\text{)}$ | $\theta_s \text{ (m}^3\cdot\text{m}^{-3}\text{)}$ | $\rho_{db} \text{ (kg}\cdot\text{m}^{-3}\text{)}$ |
| Sandy Loam          | 900                                                           | > 0.40            | 0.22                                                                          | 0.896                                                                         | 0.559                                             | 1259.7                                            |
| Silty Clay Loam     | 1150                                                          | < 0.40            | 0.36                                                                          | 0.69                                                                          | 0.539                                             | 1215.8                                            |
| Sand <sup>[1]</sup> | 900                                                           | > 0.40            | 0.22                                                                          | 0.896                                                                         | 0.559                                             | 1259.7                                            |

[1] Sand core samples not extracted and analyzed; values for sandy loam used.
